# Supplementary material
Source: MDPI journal article supplement (https://www.mdpi.com/2073-4344/12/2/172)
Supplement: s1 [file s1 › catalysts-1526590-supplementary.pdf]

# Low Temperature Catalytic Oxidation of Ethanol Using Ozone over Manganese Oxide-Based Catalysts in Powdered and Monolithic Forms

Houcine Touati, Sabine Valange\*, Marc Reinholdt, Catherine Batiot-Dupeyrat\*, Jean-Marc Clacens\*, Jean-Michel Tatibouët

Institut de Chimie des Milieux et Matériaux de Poitiers (IC2MP), UMR CNRS 7285, Université de Poitiers, ENSI Poitiers, 1 rue marcel Doré, TSA 41105, CEDEX 9, 86073 Poitiers, France

\* Corresponding authors.

E-mail addresses: sabine.valange@univ-poitiers.fr (S.V.), catherine.batiot.dupeyrat@univ-poitiers.fr (C.B.-D.); jean-marc.clacens@univ-poitiers.fr (J.-M.C.)

## Electronic Supporting Information

**Scheme S1:** Experimental setup and reaction procedure. **P2**

**Table S1:** Textural properties of the TiO<sub>2</sub>mM support and the corresponding supported Mn and Pd catalysts (all calcined at 400 °C). **P3**

**Table S2:** Characteristics of the monolith catalysts (F<sub>M</sub>: full monolith = 54 channels; P<sub>M</sub>: partially plugged monolith = 16 channels). **P4**

**Figure S1:** Raman spectra of the meso-macrostructured TiO<sub>2</sub>mM support and the corresponding supported Mn/TiO<sub>2</sub>-mM samples (5, 10 and 20 Mn wt%) **P5**

**Figure S2:** Ethanol conversion, ozone conversion, products selectivity and carbon balance as a function of time on stream in dry (left) and humid (right) conditions (catalyst = 20 mg, total flow rate = 500 mL min<sup>-1</sup>, [EtOH]=10 ppm, [O<sub>3</sub>] = 70 ppm, T = 60 °C) for the 10Mn/TiO<sub>2</sub> mM catalyst calcined at 400 °C. **P6**

**Figure S3:** Ethanol conversion, ozone conversion, products selectivity and carbon balance as a function of time on stream in dry (left) and humid (right) conditions (catalyst = 20 mg, total flow rate = 500 mL min<sup>-1</sup>, [EtOH]=10 ppm, [O<sub>3</sub>] = 70 ppm, T = 60 °C) for the 20Mn/TiO<sub>2</sub> mM catalyst calcined at 400 °C. **P7**

**Figure S4:** Ozone conversion as a function of time on stream in dry conditions over the manganese-impregnated full monolithic catalyst 5Mn-Ti/FM with 54 channels ([O<sub>3</sub>] = 70 ppm, T = 60 °C), followed

by a 20 min purge with air after 3 h of reaction. Then reaction change from ozone decomposition to the oxidation of ethanol using ozone over the same 5Mn-Ti/FM monolithic catalyst, showing the conversion of ethanol and ozone (Total flow rate = 500 mL min<sup>-1</sup>, [EtOH]=10 ppm, [O<sub>3</sub>] = 70 ppm, T = 60 °C). **P8**

## Experimental setup and reaction procedure

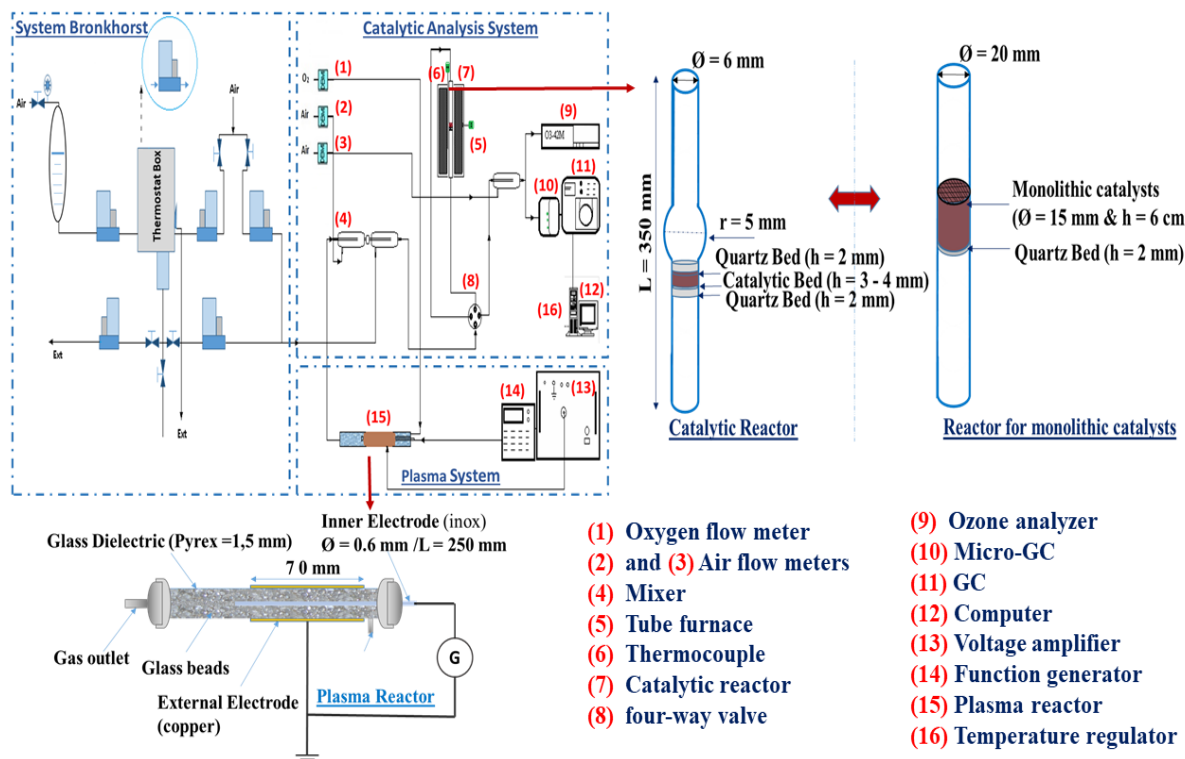

Scheme S1: Experimental setup.

The liquid VOC (i.e. ethanol) is introduced into a Bronkhorst evaporating system and mixed with an air flow. The desired concentration of ethanol is fixed at 10 ppm. It was obtained by diluting the initial ethanol flow with an air flow rate of 350 ml min<sup>-1</sup>.

The generator used for the production of O<sub>3</sub> is a laboratory-scale plasma reactor of cylindrical geometry. It is made of glass, 20 mm in diameter and 400 mm in length. It consists of a stainless-steel electrode (a rod 250 mm in length and 0.6 mm in diameter) placed in the middle of the reactor and a second cylindrical copper electrode 70 mm in length surrounding the reactor. This electrode is connected to the ground. The reactor is filled with glass beads ( $\phi$  = 2 mm) and ozone is generated from a stream of pure oxygen. The power supply is provided by a high voltage amplifier (frequency = 100 Hz and voltage = 20 kV) driven by a function generator providing a sinusoidal current that permits the output voltage to be controlled in the range of 0 to 20 kV.

The catalytic experiments on the powdered catalysts were carried out in a glass reactor. The catalyst was placed in the middle of the reactor and maintained by two 5 mm plugs of glass wool. The reactor is placed in a tubular furnace which accurately controls the reaction temperature at 60 °C. The catalytic tests on cordierite monoliths were carried out under the same operating conditions in a glass reactor equipped with quartz frit serving as support for the monolith. Reactor details are available on Scheme 1.

**Table S1**

Textural properties of the TiO<sub>2</sub>mM support and the corresponding supported Mn and Pd catalysts (all calcined at 400 °C).

| Catalysts                     | S <sub>BET</sub><br>(m <sup>2</sup> g <sup>-1</sup> ) | V <sub>p</sub><br>(cm <sup>3</sup> g <sup>-1</sup> ) |
|-------------------------------|-------------------------------------------------------|------------------------------------------------------|
| TiO <sub>2</sub> mM           | 136                                                   | 0.25                                                 |
| 5Mn/TiO <sub>2</sub> mM       | 123                                                   | 0.22                                                 |
| 10Mn/TiO <sub>2</sub> mM      | 113                                                   | 0.20                                                 |
| 20Mn/TiO <sub>2</sub> mM      | 91                                                    | 0.14                                                 |
| 0.5Pd-5Mn/TiO <sub>2</sub> mM | 86                                                    | 0.20                                                 |

**Table S2**

Characteristics of the monolith catalysts (F<sub>M</sub>: full monolith = 54 channels; P<sub>M</sub>: partially plugged monolith = 16 channels).

| <b>Catalyst</b>             | <b>TiO<sub>2</sub> (wt%)</b> | <b>Mn (wt%)*</b> | <b>Pd (wt%)*</b> | <b>Active channels</b> |
|-----------------------------|------------------------------|------------------|------------------|------------------------|
| Ti/F <sub>M</sub>           | 14                           | 0                | 0                | 54                     |
| Ti/P <sub>M</sub>           | 14                           | 0                | 0                | 16                     |
| 5Mn-Ti/F <sub>M</sub>       | 14                           | 5                | 0                | 54                     |
| 5Mn-Ti/P <sub>M</sub>       | 14                           | 5                | 0                | 16                     |
| 0.5Pd-5Mn-Ti/F <sub>M</sub> | 14                           | 5                | 0.5              | 54                     |
| 0.5Pd-5Mn-Ti/P <sub>M</sub> | 14                           | 5                | 0.5              | 16                     |

\*Expected values

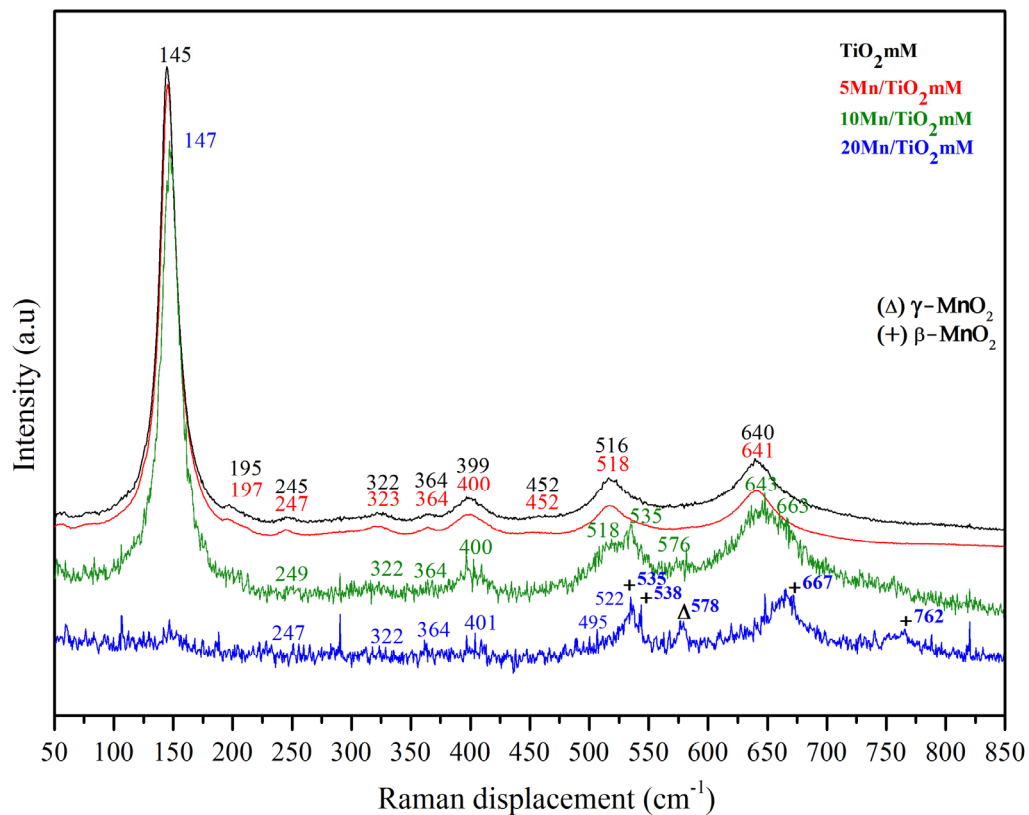

**Figure S1:** Raman spectra of the meso-macrostructured  $\text{TiO}_2\text{mM}$  support and the corresponding supported Mn/ $\text{TiO}_2\text{-mM}$  samples (5, 10 and 20 Mn wt%).

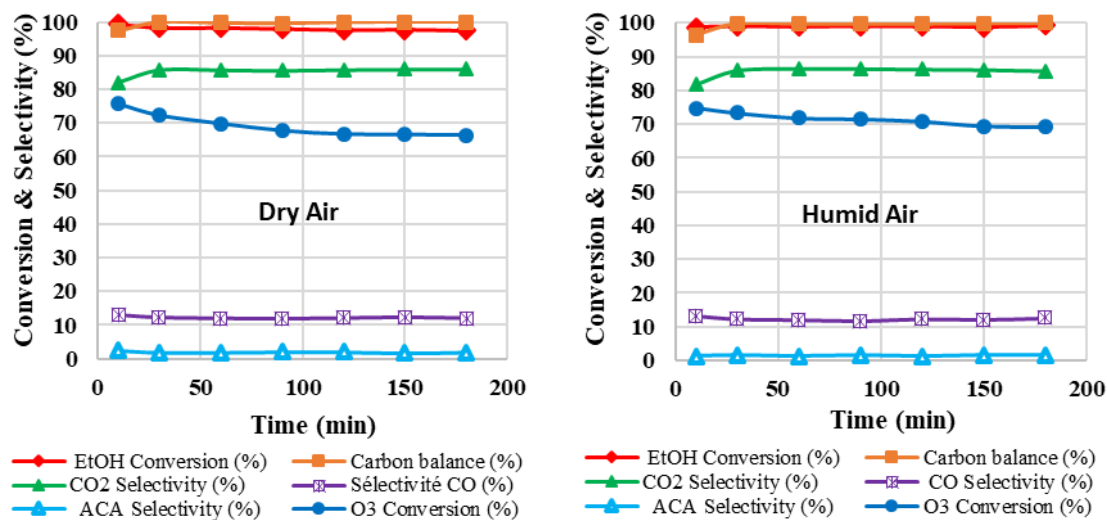

**Figure S2:** Ethanol conversion, ozone conversion, products selectivity and carbon balance as a function of time on stream in dry (left) and humid (right) conditions (catalyst = 20 mg, total flow rate = 500 mL min<sup>-1</sup>, [EtOH]=10 ppm, [O<sub>3</sub>] = 70 ppm, T = 60 °C) for the 10Mn/TiO<sub>2</sub> mM catalyst calcined at 400 °C.

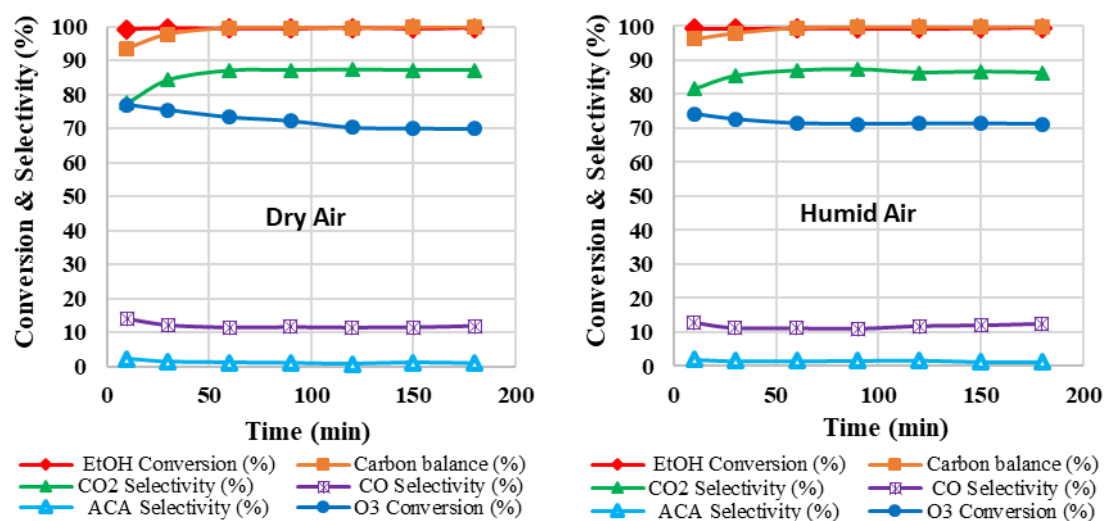

**Figure S3:** Ethanol conversion, ozone conversion, products selectivity and carbon balance as a function of time on stream in dry (left) and humid (right) conditions (catalyst = 20 mg, total flow rate = 500 mL min<sup>-1</sup>, [EtOH]=10 ppm, [O<sub>3</sub>] = 70 ppm, T = 60 °C) for the 20Mn/TiO<sub>2</sub> mM catalyst calcined at 400 °C.

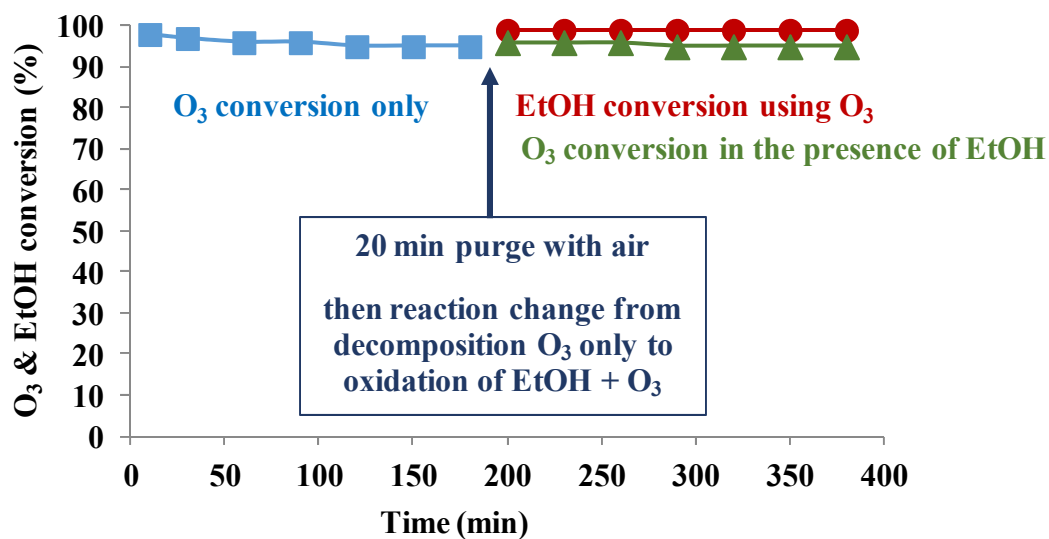

**Figure S4:** Ozone conversion as a function of time on stream in dry conditions over the manganese-impregnated full monolithic catalyst 5Mn-Ti/FM with 54 channels ( $[O_3] = 70$  ppm,  $T = 60$  °C), followed by a 20 min purge with air after 3 h of reaction. Then reaction change from ozone decomposition to the oxidation of ethanol using ozone over the same 5Mn-Ti/FM monolithic catalyst, showing the conversion of ethanol and ozone (Total flow rate =  $500 \text{ mL min}^{-1}$ ,  $[EtOH]=10$  ppm,  $[O_3] = 70$  ppm,  $T = 60$  °C).
